# Supplementary material for: WNT3A promotes myogenesis of human embryonic stem cells and enhances in vivo engraftment
Source: PubMed Central journal article supplement — Sci Rep. 2014 Aug 1;4:5916. doi: 10.1038/srep05916 (PMC5379990; doi:10.1038/srep05916), 2014-08-01
Supplement: srep05916-s1.pdf [file srep05916-s1.pdf]

**Title: WNT3A promotes myogenesis of human embryonic stem cells and enhances *in vivo* engraftment**

Yongsung Hwang<sup>1</sup>, Samuel Suk<sup>1</sup>, Yu-Ru Vernon Shih<sup>1</sup>, Timothy Seo<sup>2</sup>, Bin Du<sup>1</sup>, Yun Xie<sup>1</sup>, Ziyang Li<sup>1</sup>, and Shyni Varghese<sup>1</sup>

**Author Affiliations:**

<sup>1</sup>Department of Bioengineering, University of California, San Diego, La Jolla, California, USA.

<sup>2</sup>Department of Nanoengineering, University of California, San Diego, La Jolla, California, USA.

**Supplementary Information**

Figures S1-S6

Table S1

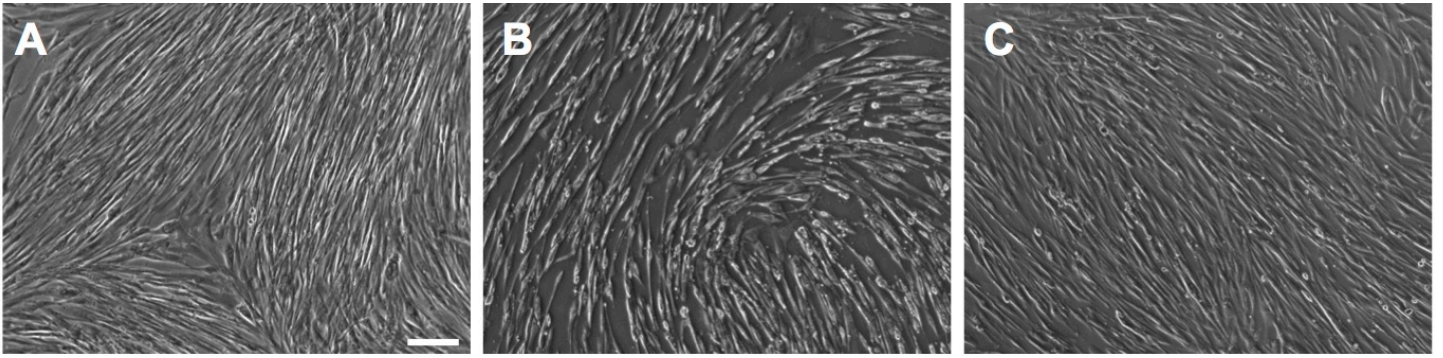

**Figure S1. Characterization of cellular morphology of PDGFRA<sup>+</sup> cells.** Phase contrast images of PDGFRA<sup>+</sup> cells undergoing myogenic differentiation in induction medium only (A), L-cell-conditioned induction medium (B), and WNT3A-conditioned induction medium (C) for 7 days. Scale bar = 200  $\mu$ m.

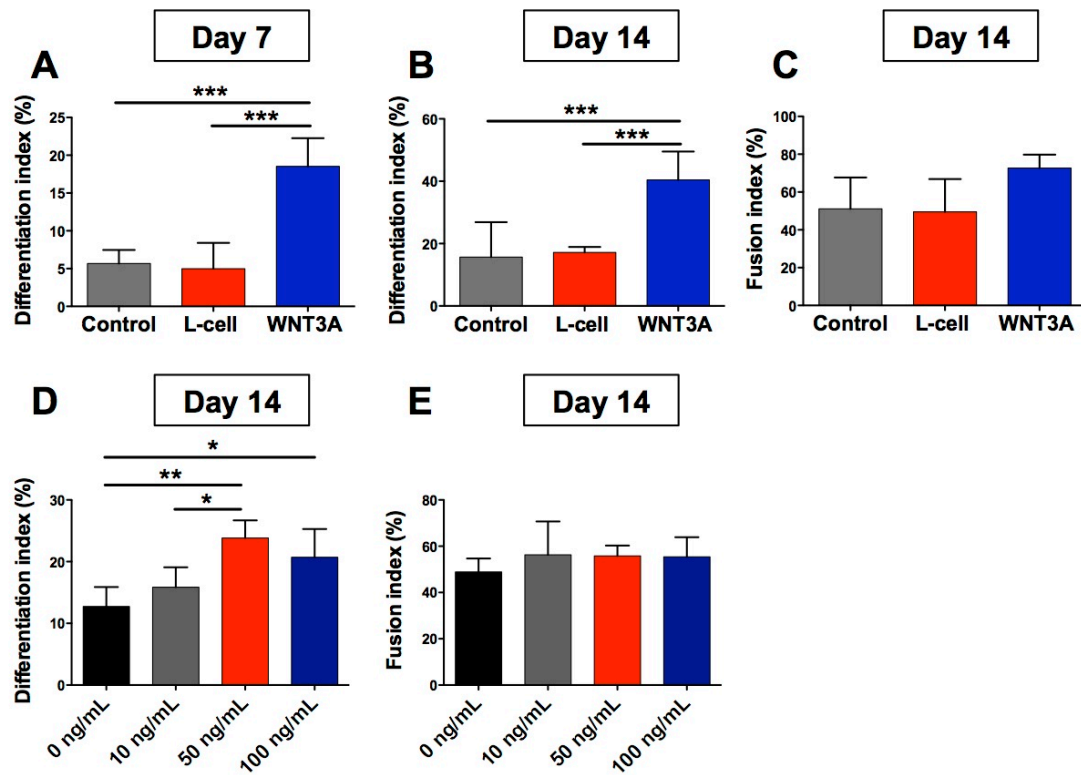

**Figure S2. Image analysis demonstrating differentiation and fusion indices of PDGFRA<sup>+</sup> cells undergoing myogenic differentiation.** Estimated differentiation indices of PDGFRA<sup>+</sup> cells undergoing myogenic differentiation in induction medium only (grey), L-cell-conditioned (red), and WNT3A-conditioned (blue) induction media for 7 days (A) and 14 days (B). n = 315, 398, and 192 (for day 7) and n = 642, 360, and 923 (for day 14), respectively. (C) Estimated fusion indices of differentiated PDGFRA<sup>+</sup> cells cultured in induction medium only (grey), L-cell conditioned (red), and WNT3A-conditioned (blue) induction media for 14 days (MF20 positive cells having >3 nuclei). n = 642, 360, and 923, respectively. (D) Estimated differentiation indices of PDGFRA<sup>+</sup> cells undergoing myogenic differentiation in induction medium only, and medium supplemented with varying amount of recombinant human WNT3A protein for 14 days. n = 1701, 1220, 1069, and 881, respectively. (E) Estimated fusion indices of differentiated PDGFRA<sup>+</sup> cells cultured in induction medium only, and medium supplemented with varying amount of recombinant human WNT3A protein for 14 days. (MF20 positive cells having >3 nuclei). n = 1701, 1220, 1069, and 881, respectively. \**p*<0.05, \*\**p*<0.01, and \*\*\**p*<0.001.

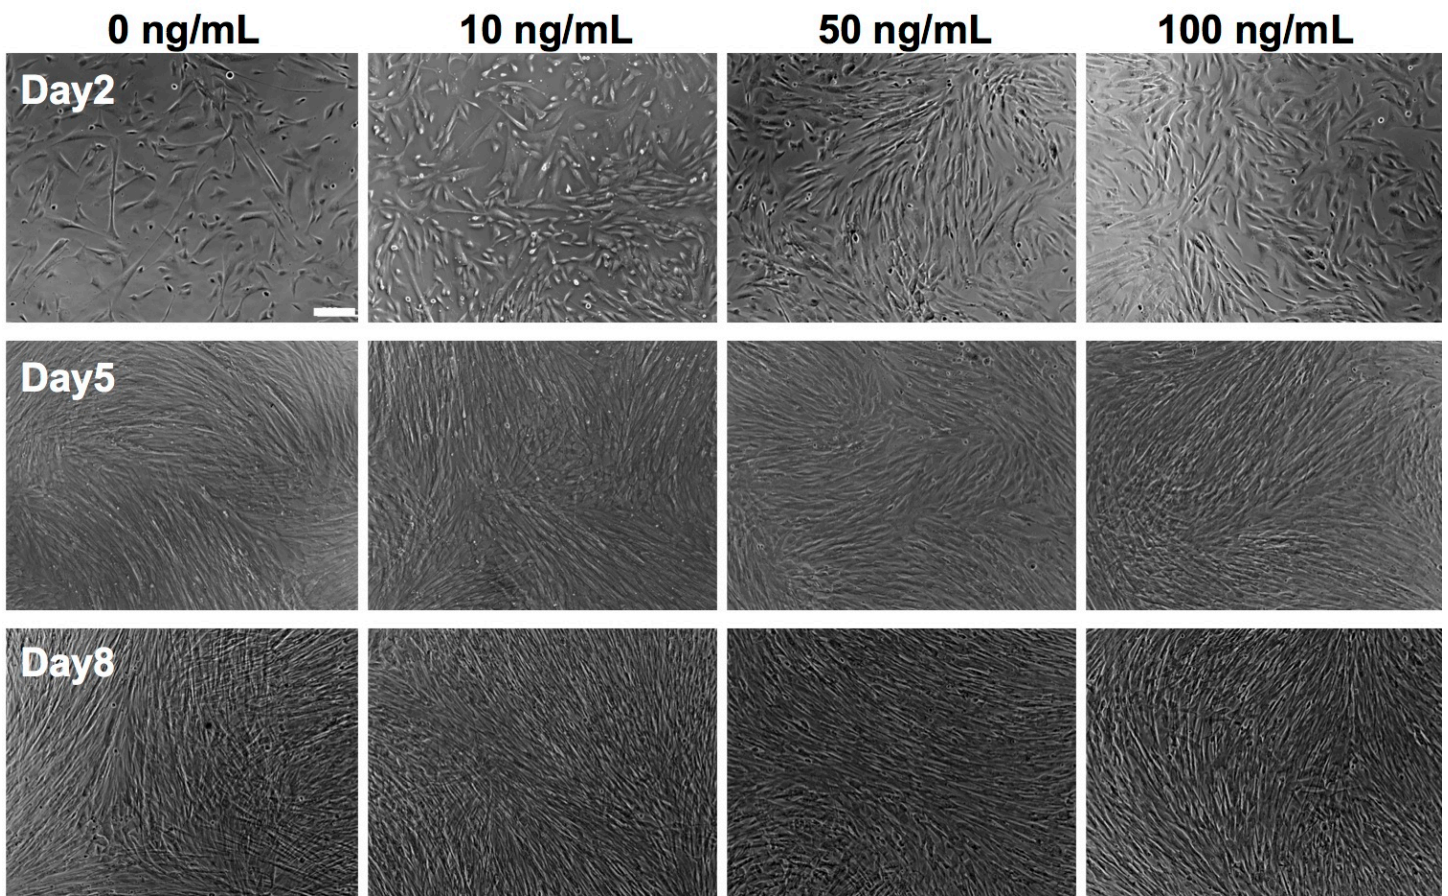

**Figure S3. Characterization of cellular morphology of PDGFRA<sup>+</sup> cells cultured in the presence of recombinant human WNT3A protein.** Phase contrast images of PDGFRA<sup>+</sup> cells undergoing myogenic differentiation in induction medium supplemented with 0, 10, 50, and 100 ng/mL of recombinant human WNT3A protein as a function of time. Scale bar = 200  $\mu$ m.

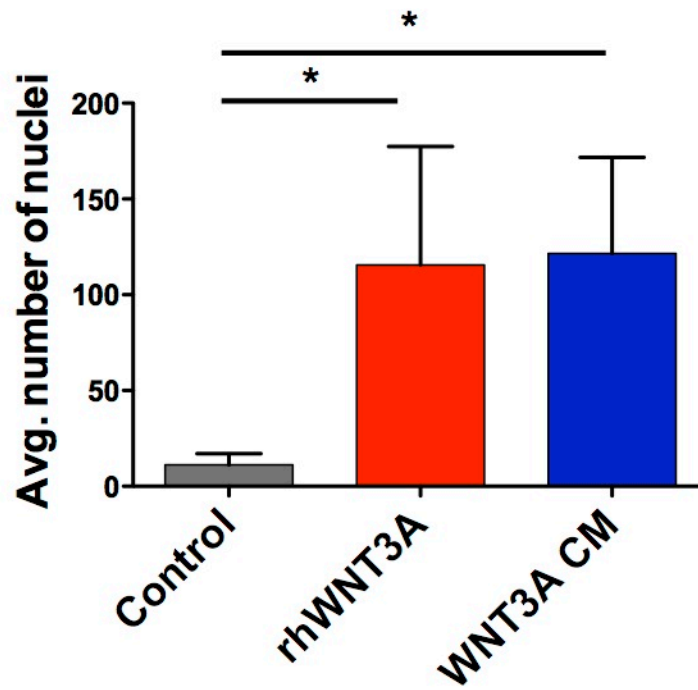

**Figure S4. Quantification of engraftment efficiency of PDGFRA<sup>+</sup> cells.** Engraftment efficiency of transplanted cells cultured in induction medium only (grey), induction medium supplemented with 50 ng/mL of recombinant human WNT3A protein (red), and WNT3A-conditioned induction medium (blue) for 14 days *in vitro* prior to the transplantation was represented as the average number of human lamin A/C<sup>+</sup> cells per each sections.

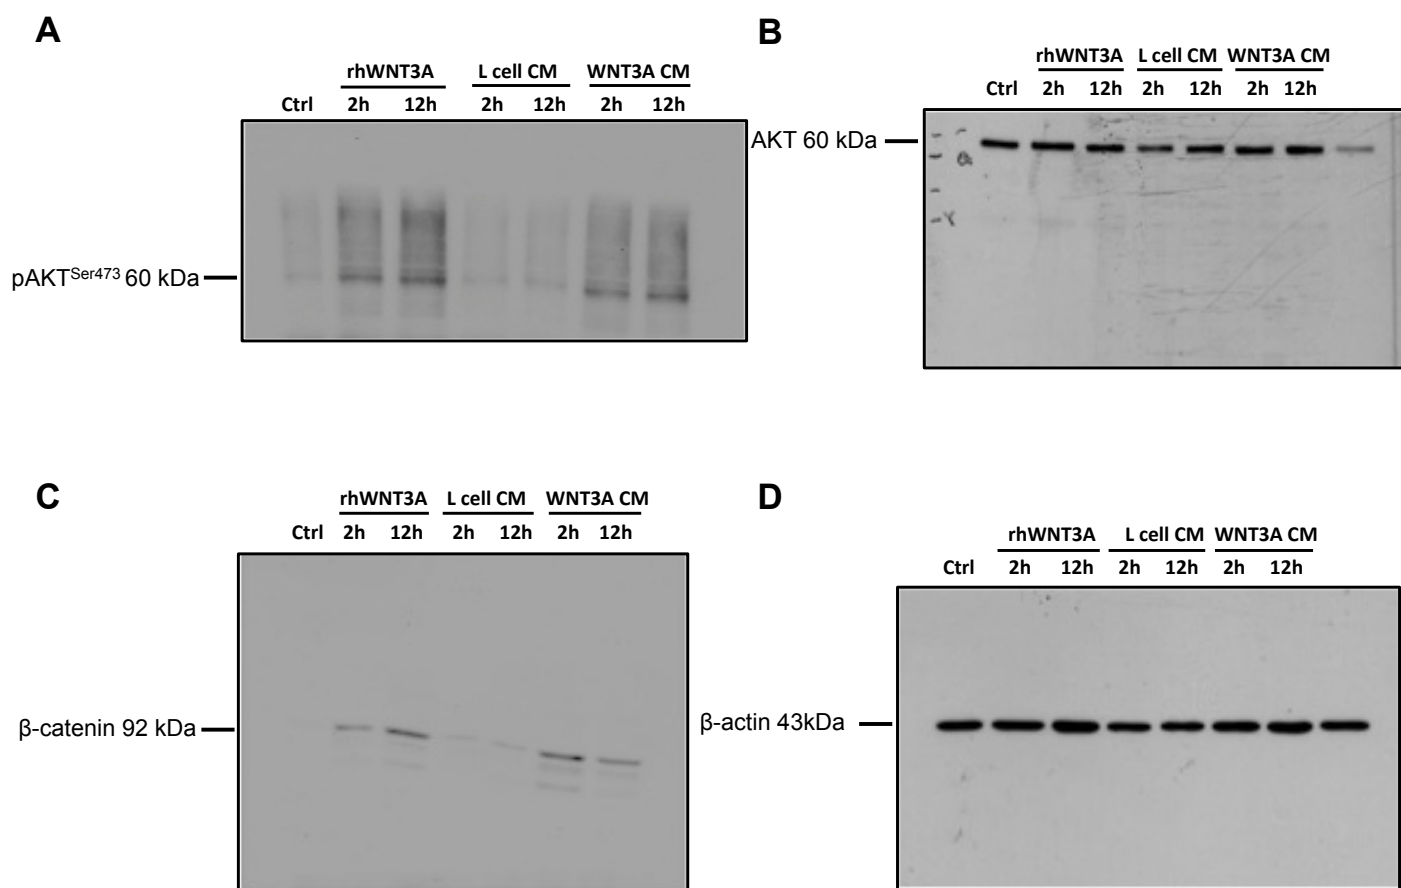

**Figure S5. Full-length Western blot images for Figure 4B and 5D.** (A) PhosphoAKT<sup>Ser473</sup> of WNT3A-conditioned induction medium (WNT3A CM) treated (Fig. 4B) and recombinant human WNT3A (rhWNT3A) protein-treated (Fig. 5D) cells. (B) Total AKT of WNT3A CM-treated (Fig. 4B) and rhWNT3A-treated (Fig. 5D) cells. (C) Active β-catenin of WNT3A CM-treated (Fig. 4B) and rhWNT3A protein-treated (Fig. 5D) cells. (D) β-actin of WNT3A CM-treated (Fig. 4B) and rhWNT3A protein-treated (Fig. 5D) cells. Ctrl: Control for rhWNT3A. L cell CM: Control for WNT3A CM.



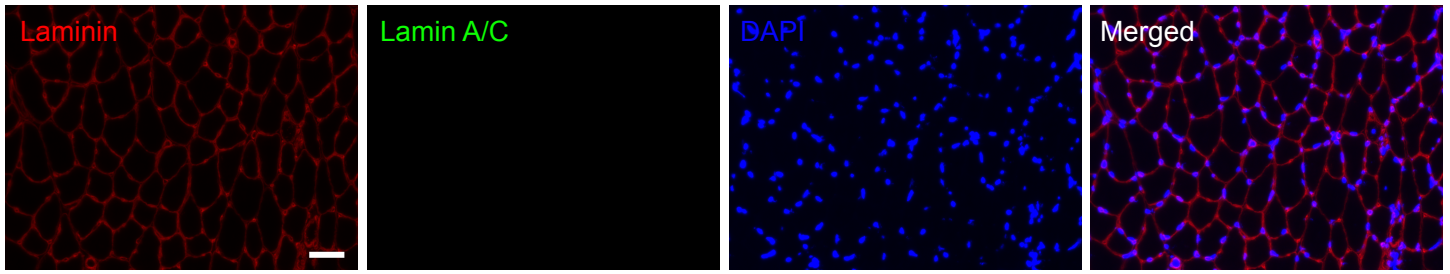

**Figure S6. Immunofluorescence staining for human-specific lamin A/C in negative control.** TA muscle section from NOD/SCID mice injected with the same volume of PBS devoid of any cells was stained with lamin A/C to determine its specificity. Scale bar = 20  $\mu\text{m}$ .

| <b>Gene</b> | <b>Primer Sequence (5' to 3')</b>                                      |
|-------------|------------------------------------------------------------------------|
| PAX3        | F-TAC AGG TCT GGT TTA GCA AC<br>R-GATCTGACACAGCTTGTGGA                 |
| PAX7        | F-ACC CCT GCC TAA CCA CAT C<br>R-GCG GCA AAG AAT CTT GGA GAC           |
| MYF5        | F-TTC TCC CCA TCC CTC TCG CT<br>R-AGC CTG GTT GAC CTT CTT CAG          |
| MYOD        | F-AGC ACT ACA GCG GCG ACT C<br>R-TAG TAG GCG CCT TCG TAG CA            |
| DESMIN      | F-GAA GCT GCT GGA GGG AGA G<br>R-ATG GAC CTC AGA ACC CCT TT            |
| MYOG        | F-CAG CTC CCT CAA CCA GGA G<br>R-GCT GTG AGA GCT GCA TTC G             |
| MYH1        | F-TCT TGG ACA TTG CTG GCT TT<br>R-TCC ACT CAA TGC CTT CCT TC           |
| CD34        | F-TTT GCT TGC TGA GTT TGC TG<br>R-ATT TGA AAA TGT TCC CTG GGT          |
| FLK1        | F-CCT GTA TGG AGG AGG AGG AA<br>R-CGG CTC TTT CGC TTA CTG TT           |
| CD56        | F-TGG CTG GGA ACA ATA TCC AC<br>R-AGC CAG CAG ATT ACA ATG C            |
| WNT3A       | F-CTG CCA GGA GTG TAT TCG CAT C<br>R-GAG AGC CTC CCC GTC CAC AG        |
| CCND1       | F-GCC GTC CAT GCG GAA GAT<br>R-CCT CCT CCT CGC ACT TCT GT              |
| AXIN2       | F-GCG ATC CTG TTA ATC CTT ATC AC<br>R-AAT TCC ATC TAC ACT GCT GTC      |
| 18s         | F-CCC TGT AAT TGG AAT GAG TCC ACT T<br>R-ACG CTA TTG GAG CTG GAA TTA C |

**Table S1. List of primers used for quantitative PCR.**
